# Supplementary material
Source: MDPI journal article supplement (https://www.mdpi.com/1424-8247/15/7/790)
Supplement: s1 [file s1]

# Phytosomes as a Plausible Nano-Delivery System for Enhanced Oral Bioavailability and Improved Hepatoprotective Activity of Silymarin

Ravi Gundadka Shriram <sup>1</sup>, Afrasim Moin <sup>2</sup>, Hadil Faris Alotaibi <sup>3</sup>, El-Sayed Khafagy <sup>4,5</sup>, Ahmed Al Saqr <sup>4</sup>, Amr Selim Abu Lila <sup>2,6,\*</sup> and Rompicherla Narayana Charyulu <sup>1,\*</sup>

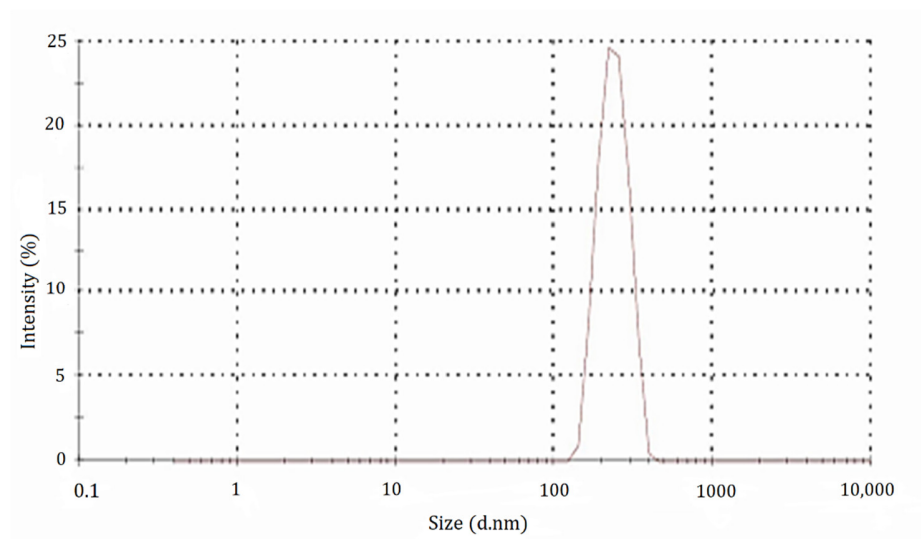

**Figure S1.** Particle size distribution of optimized silymarin phytosomal formulation

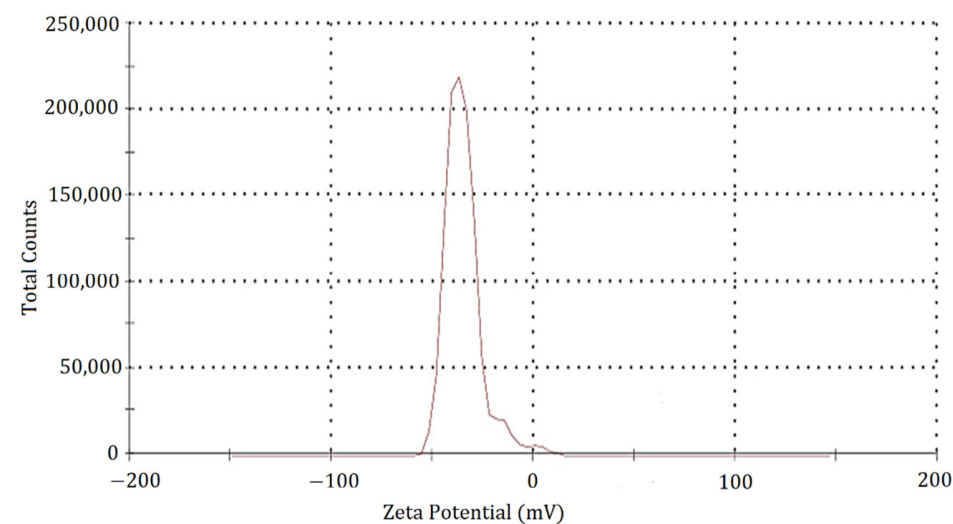

**Figure S2.** Zeta potential of optimized silymarin phytosomal formulation.
